# Supplementary material
Source: Springer Nature journal article supplement (https://www.springermedizin.de/resource/supplementary/13098_2014_327_MOESM1_ESM.pdf/9671088)

Intensity (AU)

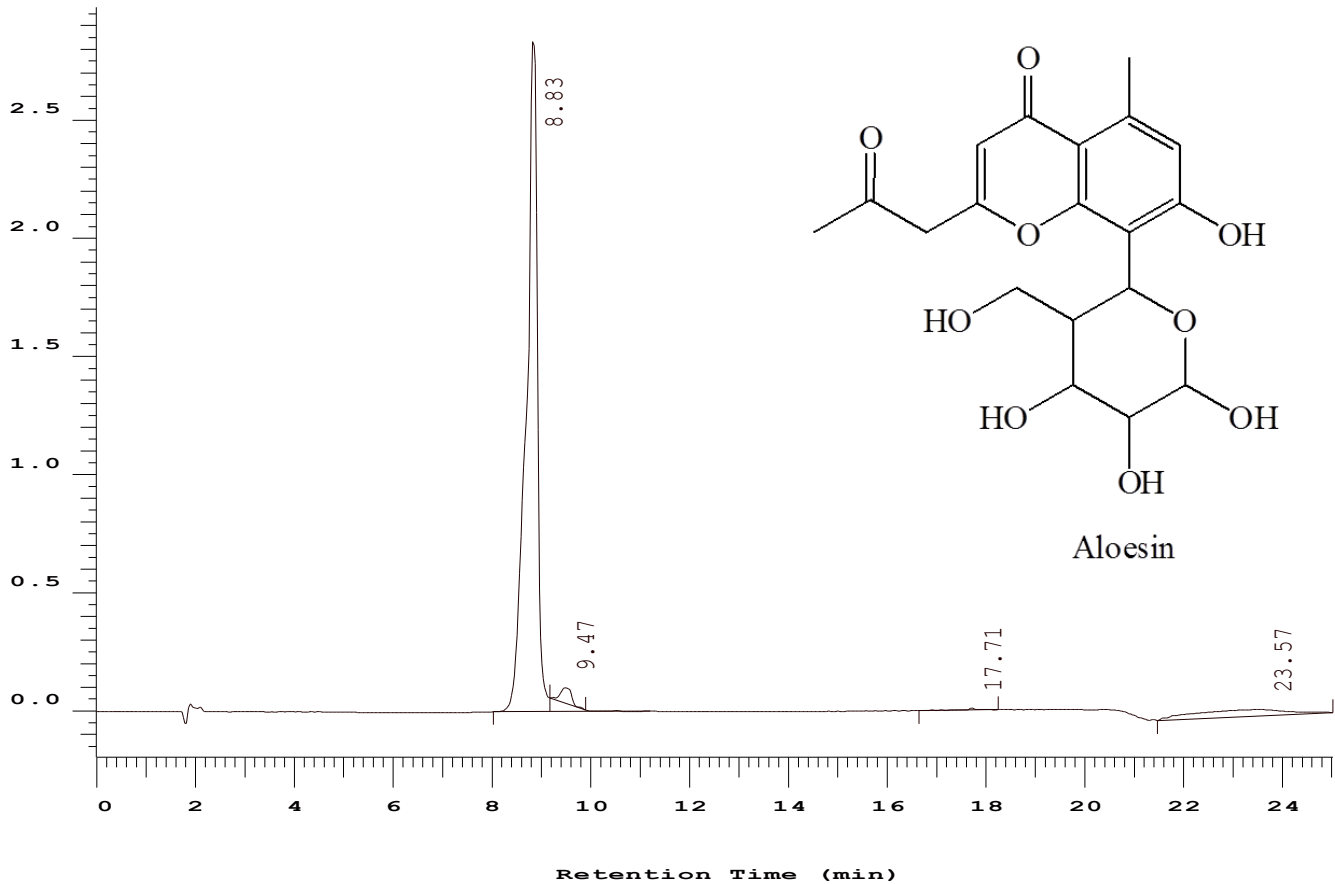

Supplement: MOESM1 [file 9671088]
